# Supplementary material for: Low serum iodine is associated with iodine deficiency and thyroid dysfunctions: a cross-sectional study
Source: Research Square preprint supplement (doi:10.21203/rs.3.rs-1730748/v1), 2022-06-13
Supplement: Supplementary file 1 [file 38392074be35aadaf2a2be68.pdf]

Table 1 Diagnostic criteria for thyroid dysfunctions

| Thyroid dysfunctions        | Diagnostic criteria                                                 |
|-----------------------------|---------------------------------------------------------------------|
| Clinical hyperthyroidism    | TSH < 0.3mIU/L, FT4 > 23.5pmol/L or TSH < 0.3mIU/L, FT3 > 6.5pmol/L |
| Subclinical hyperthyroidism | TSH < 0.3mIU/L, FT4 < 23.5pmol/L or TSH < 0.3mIU/L, FT3 < 6.5pmol/L |
| Clinical hypothyroidism     | TSH > 5.0mIU/L, FT4 < 11.5pmol/L                                    |
| Subclinical hypothyroidism  | TSH > 5.0mIU/L, FT4 > 11.5pmol/L                                    |

TSH: thyroid stimulating hormone; FT4: free thyroxine; FT3: free triiodothyronine.

Provided by the laboratory department of the General Hospital of Tianjin Medical University.
